# **Racial disparities, environmental exposures, and SARS-CoV-2 infection rates: A racial map study in the USA**

Wenyan Xu <sup>a,b,†</sup>, Bin Jiang <sup>a,b,c,\*,†</sup>, Chris Webster <sup>a</sup>, William C. Sullivan <sup>d</sup>, Yi Lu <sup>e</sup>,  
Na Chen <sup>f</sup>, Zhaowu Yu <sup>g</sup>, Bin Chen <sup>b,c,h,i\*</sup>

## **Affiliations:**

<sup>a</sup> Urban Environments & Human Health Lab, HKUrbanLabs, Faculty of Architecture, The University of Hong Kong, Hong Kong SAR

<sup>b</sup> Division of Landscape Architecture, Department of Architecture, The University of Hong Kong, Hong Kong SAR

<sup>c</sup> Urban Systems Institute, The University of Hong Kong, Hong Kong SAR

<sup>d</sup> Department of Landscape Architecture, University of Illinois at Urbana-Champaign, Illinois

<sup>e</sup> Department of Architecture and Civil Engineering, City University of Hong Kong, Hong Kong SAR

<sup>f</sup> School of Architecture & Planning, Hunan University, Changsha, Hunan province, China

<sup>g</sup> Department of Environmental Science and Engineering, Fudan University, Shanghai, China

<sup>h</sup> Future Urbanity & Sustainable Environment (FUSE) Lab, HKUrbanLabs, Faculty of Architecture, The University of Hong Kong, Hong Kong SAR

<sup>i</sup> HKU Musketeers Foundation Institute of Data Science, The University of Hong Kong, Hong Kong SAR

<sup>†</sup>The authors contributed equally to this work.

## **\*Corresponding authors:**

### **Bin Jiang**

Postal Address: 614 Knowles Building, Pokfulam Road, The University of Hong Kong, Hong Kong SAR

Email: [jiangbin@hku.hk](mailto:jiangbin@hku.hk)

### **Bin Chen**

Postal Address: Division of Landscape Architecture, Faculty of Architecture, The University of Hong Kong, Hong Kong SAR

Email: [binley.chen@hku.hk](mailto:binley.chen@hku.hk)

## Abstract

Since the onset of the COVID-19 pandemic, researchers mainly examined how socio-economic, demographic, and environmental factors are related to disparities in SARS-CoV-2 infection rates. However, we don't know the extent to which racial disparities in environmental exposure are related to racial disparities in SARS-CoV-2 infection rates. To address this critical issue, we gathered black vs. white infection records from 1416 counties in the contiguous United States. For these counties, we used 30m-spatial resolution land cover data and racial mappings to quantify the racial disparity between black and white people's two types of environmental exposure, including exposures to various types of landscape settings and urban development intensities. We found that racial disparities in SARS-CoV-2 infection rates and racial disparities in exposure to various types of landscapes and urban development intensities were significant and showed similar patterns. Specifically, less racial disparity in exposure to forests outside park, pasture/hay, and urban areas with low and medium development intensities were significantly associated with lower racial disparities in SARS-CoV-2 infection rates. Distance was also critical. The positive association between racial disparities in environmental exposures and racial disparity in SARS-CoV-2 infection rates was strongest within a comfortable walking distance (approximately 400m).

## Highlights

- Racial dot map and landcover map were used for population-weighted analysis.
- Racial disparity in environmental exposures and SARS-CoV-2 infection were linked.
- Forests outside park are the most beneficial landscape settings.
- Urban areas with low development intensity are the most beneficial urban areas.
- Landscape and urban exposures within the 400m buffer distances are most beneficial.

# 1 Introduction

## 2 1.1 Background

3 Racial disparity in health outcomes is a critical challenge in the United States and many  
 4 other countries (Braveman et al., 2011). Many studies suggest that socio-economic and  
 5 demographic disparities can lead to environmental disparities which then lead to human  
 6 health disparities (Song et al., 2021; World Health Organization, 2010). A handful of studies  
 7 have suggested that racial disparities in SARS-CoV-2 infection rates have a significant  
 8 relationship with the racial disparities in environmental exposure to various landscape and  
 9 urban settings; However, there is still much we do not know (Lu, Chen, et al., 2021). This  
 10 study investigates the relationships among racial disparities in landscape and urban  
 11 environment exposure and disparities in SARS-CoV-2 infection rates. This research may help  
 12 governments prioritize resources to provide more equitable access to supportive natural and  
 13 urban settings to reduce racial disparities in health outcomes for current COVID-19 pandemic  
 14 and similar public health crisis in the future.

15 Generally, previous studies exploring the disparities between environmental exposures and  
 16 SARS-CoV-2 infection rates has considered four types of relationships although those studies  
 17 have many limitations in research design and measurements:

- 18 (1) The relationship between landscape exposure and SARS-CoV-2 infection rates;
- 19 (2) The relationship between racial disparity in landscape exposure and racial disparity  
 20 in SARS-CoV-2 infection rates;
- 21 (3) The relationship between exposure to urban settings or various urban densities and  
 22 SARS-CoV-2 infection; and
- 23 (4) The relationship between racial disparity in exposure to urban settings and urban  
 24 densities and racial disparities in SARS-CoV-2 infection rates.

## 25    **1.2 Landscape exposure and SARS-CoV-2 infection**

26        Landscape exposure can be defined as passive or active contact with various types of  
27    green space. A growing number of studies have explored the relationship between landscape  
28    exposure and SARS-CoV-2 infection rates. Generally, these studies suggest that higher levels  
29    of landscape exposure are associated with a lower risk of SARS-CoV-2 infection. One study  
30    found that county-level SARS-CoV-2 infection rates decreased for every 1% increase in tree  
31    canopy, suggesting green spaces' protective effect (Klompaker et al., 2021). Greater access  
32    to green spaces was associated with lower transmission speed of COVID-19 (Alidadi &  
33    Sharifi, 2022), and total green space was negatively associated with SARS-CoV-2 infection  
34    rate (Jiang et al., 2022) and mortality rate (Yang et al., 2022). In contrast, higher density of  
35    public landscape settings in a high-density city was associated with higher rates of COVID-  
36    19 morbidity during the early stages of the COVID-19 pandemic, perhaps because of  
37    increased social contact with other people elicited by those settings (You et al., 2020).

## 38    **1.3 Racial disparity in landscape exposure and racial disparity in SARS-CoV-2 infection**

39        Although studies exploring racial disparity in landscape exposure and racial disparity in  
40    SARS-CoV-2 infection rates are scarce, more general studies exploring disparities in  
41    landscape exposure and disparities in public health outcomes suggest a positive relationship.  
42    Researchers have found positive causal and correlational associations between disparities in  
43    landscape exposure and disparities in health outcomes. In a natural experiment study, patients  
44    with more visual contact with green landscapes had a better recovery from a standard surgery  
45    (Ulrich, 1984). In an onsite experimental study, adding renovated green spaces to  
46    neighborhoods reduced incidences of gun violence, crimes, and sense of fear (Branas et al.,  
47    2018). A statewide study in the United States found that a lower disparity in greenness in  
48    residential environments was linked to lower cardiovascular mortality disparities between  
49    black and white men (Iyer et al., 2020). A nationwide study in England found that, in greener

50 areas, lower disparities in all-cause mortality and mortality from circulatory diseases were  
51 observed among different income groups (Mitchell & Popham, 2008).

52 A handful of studies suggest that greater racial disparity in landscape exposure may lead to  
53 a greater disparity in SARS-CoV-2 infection, but these studies have research design and  
54 measurement limitations. For example, one recent study found that a higher ratio of green  
55 spaces was linked to lower racial disparity in SARS-CoV-2 infection rates for the 135 most  
56 urbanized counties in the United States (Lu, Chen, et al., 2021). However, this study did not  
57 investigate the relationship in less urbanized counties. It also did not control for the spatial  
58 distribution of racial populations and green spaces in the statistical analysis. Another study  
59 found that racial disparity in access to greenness was associated with a lower incidence of  
60 COVID-19 infection in the United States (Spotswood et al., 2021). However, the study  
61 examined only 17 states and used Normalized Difference Vegetation Index (NDVI) to  
62 measure greenness, which cannot fully represent the nationwide association and differentiate  
63 the contributions of distinct types of landscape settings. Lastly and most importantly, both  
64 studies did not consider the spatial distribution of different green spaces and the spatial  
65 distribution of different racial populations, which make the findings vulnerable to a possible  
66 ecological fallacy. An ecological fallacy is a logical error that occurs when the characteristics  
67 of a group are attributed to an individual; individual attributes cannot be deduced from  
68 statistical inferences of the group to which such individuals belong (Firebaugh, 2001;  
69 Woodruff et al., 2018).

#### 70 **1.4 Urban exposure and SARS-CoV-2 infection**

71 Urban exposure can be defined as daily exposure to urban settings with low, moderate, or  
72 high development intensity. Many studies have shown that exposure to settings with different  
73 levels of urbanicity can produce different impacts on public health (e.g., McMichael, 2000;  
74 Son et al., 2020). Studies have found that exposure to more urbanized environments is

generally more harmful for both mental and physical health due to lack of access to green spaces (Das et al., 2008; Jiang et al., 2022; Luo & Jiang, 2022; Venkatramana & Reddy, 2002). However, other studies have found that developed urban environments have higher levels of social security, collaboration, and vitality, which may collectively promote residents' general health (Jauho & Helén, 2022; Mouratidis & Poortinga, 2020). Few studies have explored how exposure to urban settings is related to airborne infectious disease rates. Moreover, whether and to what extent the collinearity effect does exist between landscape and urban exposures should be investigated so we can fully understand their effects on SARS-CoV-2 infection rates (Jiang et al., 2022; Paköz & Işık, 2022).

The few published studies investigating the relationship between various indicators of urbanicity and risk of SARS-CoV-2 infection show significant positive correlations between urban density and the number of SARS-CoV-2 infection or mortality rates (e.g., Jamshidi et al., 2020; Lin et al., 2020; Zhang & Schwartz, 2020). Less dense urban areas may have a lower risk of SARS-CoV-2 infection because they provide open spaces that allow for safer social distances and reduced density of ambient particles that convey the virus (Jiang et al., 2022; Lin et al., 2020; Wang et al., 2021). However, further investigation beyond the general linear association is necessary to fully understand the relationship. For example, a county or census tract may contain numerous parcels with different levels of development intensity and land cover types. A simple linear association may fail to describe the complex relationship.

### **1.5 Racial disparity in urban exposure and racial disparity in SARS-CoV-2 infection**

To our best knowledge, very few studies have investigated the relationship between racial disparity in urban exposure and racial disparity in SARS-CoV-2 infection. One study investigated this issue for the most urbanized counties in the US, and three measures of urban exposure were removed due to the collinearity problem (Lu, Chen, et al., 2021). This study did not explore the relationship for areas with a much larger range of urban exposure.

Another study exploring the relationship used NDVI to measure greenness, but NDVI can only roughly indicate the level of urban development intensity. More accurate measures are needed (Spotswood et al., 2021). Lastly and most importantly, both studies did not consider the spatial distribution of land parcels with different levels of development intensity and the spatial distribution of different racial populations, which make the findings may have a high risk of ecological fallacy.

## **1.6 Critical knowledge gaps**

In our understanding of the relationship between racial disparity in landscape and urban exposure and racial disparity in SARS-CoV-2 infection rates, five gaps remain.

First, previous studies do not consider the spatial distribution of racial populations. This makes it difficult to differentiate their exposure to nearby landscape and urban settings and leaves the findings vulnerable to ecological fallacy.

Second, previous cross-sectional studies on racial disparity issues do not adopt a within-county comparison between races. A within county comparison between racial populations may reduce the probability of ecological fallacy by mitigating bias caused by a wide variety of distinct conditions among different zones (Lu, Chen, et al., 2021).

Third, previous studies use NDVI or total greenness as measures of landscape exposure and are unable to differentiate the effects of different types of green spaces.

Fourth, few studies have comprehensively measured urban exposure, leading to a gap in our understanding of the association between urban exposure (exposure to different levels of development intensity) and racial disparity in SARS-CoV-2 infection rates.

Last, previous studies have only examined highly urbanized counties or a few regions. These findings may fail to describe the relationship between racial disparity in landscape and urban exposure and racial disparity in SARS-CoV-2 infection rates on a nationwide scale or in countries with various levels of urban density.



## 1.7 Research questions

To address these knowledge gaps, we conducted a one-year nationwide study by adopting high-resolution land cover and racial population maps. We asked the following five questions:

- (1) Whether and to what extent did black and white people have significant differences in SARS-CoV-2 infection rates?
- (2) Whether and to what extent did black and white people have significant differences in landscape and urban exposures?
- (3) Whether and to what extent were landscape and urban exposures significantly associated with infection rates for black and white people?
- (4) Whether and to what extent was the racial disparity in landscape and urban exposures significantly associated with racial disparity in SARS-CoV-2 infection rates?
- (5) Whether and how did the association between racial disparity in landscape and urban exposures and SARS-CoV-2 infection rates change as the buffer distance changed?

## 2 Method

We adopted a within-county research design with 1416 counties in the contiguous United States (US). The COVID-19 case data were collected from January 1, 2020, to December 31, 2020. In this study, the racial disparities were measured as the difference in environmental exposures and infection rates between black and white populations in the same county. The methods included defining study areas; calculating SARS-CoV-2 infection rates, landscape and urban exposures, and socio-economic and demographic characteristics; and finally conducting statistical analysis.

### 2.1 Study areas

We used counties, the fundamental administrative unit in the United States, as the basic unit of analysis. Using publicly available data from the US Centers for Disease Control and Prevention (Centers for Disease Control and Prevention, 2021), we collected infection case data and associated race and ethnicity information from a total of 3,108 counties. We excluded 1,691 counties that did not have race records for black and/or white groups (452 counties had no records for white groups, 1691 counties had no records for black groups, and 452 counties had no records for both black and white groups). We also excluded La Salle County in Texas because of a data collection error. 1416 counties were included in the study.

1223 of the 1416 selected counties (86.4%) had at least 2% black population (1633 of the 3142 counties in the US have more than 2% black population). Most of the unselected counties (those that did not have race records for black and/or white groups) contained too low of a ratio of black people. In addition, all selected 1416 counties had more than 6% white people.

To further evaluate whether the chosen 1416 counties are representative of the contiguous United States, we applied a random selection strategy based on geographic spatial distribution to select sample counties for sensitivity analysis. The country was divided into

nine divisions by the United States Census Bureau. The average rate of sample availability (1416/3142) was set as the threshold to randomly select samples in each of the nine divisions. If the available counties in the division were less than the threshold, all the available counties were selected. Otherwise, we used random sampling methods with the threshold value. We applied this random selection strategy five times to generate five sample groups. Then, we analyzed the data from these five groups of counties to answer the research questions and found high agreement in our results. Detailed findings can be found in Appendix B. Therefore, we argue that the sample pool of 1416 counties is representative enough for us to analyze the relationship between racial disparity in landscape and urban exposure and racial disparity in SARS-CoV-2 infection rate in the contiguous United States.

## **2.2 SARS-CoV-2 infection rates**

To calculate the SARS-CoV-2 infection rate for black and white people, we retrieved the total white and black population counts for each county, retrieved from 2019 census data (United States Census Bureau, 2020). The racial disparity in SARS-CoV-2 infection rates was calculated as the difference between the infection rate in black individuals and the infection rate in white individuals for the same county.

## **2.3 Landscape and urban exposures: Land cover & racial population mapping**

### **2.3.1 Landscape settings and urban areas with different levels of development intensity**

The National Land Cover Database (NLCD) is an operational land cover monitoring program providing updated land cover and related information for the US. Using the NLCD 2019 dataset (<https://www.mrlc.gov>), we extracted two major types of land cover: landscape settings (green spaces) and urban areas with different levels of development intensity. The following land-cover types were classified as landscape settings: a) developed open space; b) deciduous forest, evergreen forest, and mixed forest (combined into one forest category); c) grassland and herbaceous; and d) pasture and hay. Urban areas were classified according to

low, medium, or high development level based on the proportion of constructed material and vegetation (Yang et al., 2018). Low development intensity is typified by mostly vegetation (20–49% impervious surfaces), medium development intensity by single-family homes (50–79% impervious surfaces), and high development intensity by frequently traversed areas (80–100% impervious surfaces).

### 2.3.2 Mapping racial populations in the United States

We used racial data collected and shared by SocScape (Social Landscape) to map the black and white populations in the United States at a high resolution (30m grids) (Figure 1). SocScape is a research project which aims to provide mapping resources to visualize and analyze residential segregation and racial diversity in the conterminous United States and United States metropolitan areas (<http://www.socscape.edu.pl/>). It shows 30m grids of seven race/ethnicity sub-populations: non-Hispanic whites, non-Hispanic blacks, non-Hispanic Asians, non-Hispanic American Indians, non-Hispanic Native Hawaiians and Other Pacific Islanders, non-Hispanic other races, and Hispanics. The racial dot map of non-Hispanic whites and non-Hispanic blacks was used in this study (Figure 1). The 30m grids have been developed using dasymetric modeling, which has a high accuracy of gridded population data over commonly used Census tract/blocks-aggregated data (Dmowska & Stepinski, 2019; Dmowska et al., 2017).

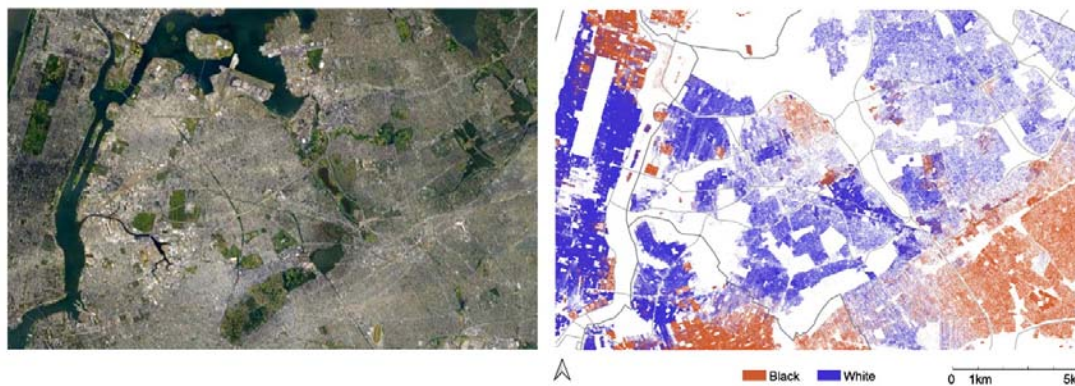

**Figure 1.** Left: The Google Earth image of an area in the New York City, USA; Right: The black-white racial dot map of the same area.

### 2.3.3 Exposure to landscape settings

The four types of landscape settings with predominant natural elements were assessed at 30m resolution. We divided developed open space and forest by park boundaries into inside and outside park factors (Ersi, 2021). We calculated black-white population-weighted green space exposure for varying buffer distances in each county to identify the impact of different landscape settings on racial disparity in infection rates. The population-weighted exposure assessment incorporated the spatial distribution of population footprint into landscape exposure estimates by giving proportionally greater weight to landscape settings near areas with higher densities of human residents.

Race population-weighted green space exposure was calculated with the Google Earth Engine (GEE) using NLCD 2019. The 30m resolution NLCD, 2019 Landsat imagery matched well with the 30m spatial resolution of the racial map in GEE. This enabled the population-weighted landscape exposure within various buffer sizes in each county. The race population-weighted landscape exposure for different buffer sizes in each county is defined in Equation (1) (Chen, Song, Jiang, et al., 2018; Chen, Song, Kwan, et al., 2018; Chen et al., 2022),

$$GE^d = \frac{\sum_{i=1}^N P_i \times G_i^d}{\sum_{i=1}^N P_i}$$

where  $P_i$  is the black or white population of the  $i$ th grid,  $G_i^d$  is the green space of the  $i$ th grid at a buffer size of  $b$  meters,  $N$  is the total number of grids for a given county, and  $GE$  is the estimated landscape exposure level for the given county. We calculated landscape exposure levels by varying the buffer size from 100m to 5km (the maximum appropriate walking distance in the United States, based on Yang & Diez-Roux, 2012) to examine the association between different proximities to landscape settings and the infection disparity between black and white people. The relative exposure difference between black and white people of these areas was calculated as explanatory variables in the generalized linear mixed model to examine their contribution to mitigating racial disparity of infection rates.

#### **2.3.4 Exposure to areas with different levels of development intensity**

The dominant land-cover types in the areas with different levels of development were also considered. We calculated the exposure ratio using the same methods we used for landscape settings. Urban areas with three levels of development intensity from NLCD 2019 were categorized as urban areas with low, medium, and high development intensity (Appendix Table S1(a)). The exposure difference between black and white people in these areas was also calculated using buffer sizes from 100m to 5km.

#### **2.4 Socio-economic and demographic characteristics as covariates**

Previous studies have shown that socioeconomic and demographic characteristics are important predictors of SARS-CoV-2 infection risk and racial disparity in infection rates (Abedi et al., 2020; Figueroa et al., 2020). Thus, we adjusted for the potential confounding factors of black or white people's socioeconomic and demographic characteristics. The descriptive statistics for each variable are presented in Table 1 and Appendix Table S1 (b).

**Table 1.** Descriptive statistics of socio-demographic characteristics of 1320 counties (96 counties without the information)

| Variables                                                             | Min    | Max    | Mean      | SD        |
|-----------------------------------------------------------------------|--------|--------|-----------|-----------|
| Median household income of the Black                                  | 2499   | 250001 | 39673.900 | 17873.990 |
| Median age of the Black                                               | 15.700 | 57.400 | 34.480    | 5.821     |
| Percentage of the Black                                               | 0.003  | 0.872  | 0.173     | 0.170     |
| Percentage of the Black in labor force                                | 0.001  | 0.944  | 0.637     | 0.142     |
| Percentage of the Black in poverty                                    | 0      | 0.730  | 0.265     | 0.111     |
| The Black of attained less than high school diploma                   | 0      | 0.519  | 0.176     | 0.081     |
| The Black of high school graduate or equivalency                      | 0      | 0.673  | 0.351     | 0.095     |
| The Black of attained some college or associate's degree              | 0      | 0.839  | 0.309     | 0.081     |
| The Black of attained bachelor's degree or higher                     | 0      | 0.800  | 0.164     | 0.102     |
| Percentage of the Black less than 18 years                            | 0      | 0.557  | 0.237     | 0.063     |
| Percentage of the Black 65 years and over                             | 0      | 0.364  | 0.113     | 0.049     |
| Percentage of the Black male                                          | 0.250  | 0.985  | 0.524     | 0.091     |
| Percentage of the Black female                                        | 0.015  | 0.750  | 0.476     | 0.091     |
| Percentage of married Black                                           | 0.030  | 0.585  | 0.299     | 0.086     |
| Median household income of the Non-Hispanic White                     | 26071  | 149087 | 61594.500 | 17225.490 |
| Median age of the Non-Hispanic White                                  | 25.300 | 69.000 | 43.970    | 5.141     |
| Percentage of the Non-Hispanic White                                  | 0.061  | 0.969  | 0.685     | 0.182     |
| Percentage of the Non-Hispanic White in labor force                   | 0.396  | 0.889  | 0.721     | 0.071     |
| Percentage of the Non-Hispanic White in poverty                       | 0.010  | 0.296  | 0.116     | 0.045     |
| The Non-Hispanic White of attained less than high school diploma      | 0.008  | 0.274  | 0.099     | 0.047     |
| The Non-Hispanic White of high school graduate or equivalency         | 0.043  | 0.545  | 0.316     | 0.080     |
| The Non-Hispanic White of Attained some college or associate's degree | 0.089  | 0.457  | 0.308     | 0.050     |
| The Non-Hispanic White of attained bachelor's degree or higher        | 0.088  | 0.860  | 0.278     | 0.124     |
| Percentage of the Non-Hispanic White less than 18 years               | 0.017  | 0.329  | 0.191     | 0.030     |
| Percentage of the Non-Hispanic White 65 years and over                | 0.085  | 0.638  | 0.206     | 0.049     |
| Percentage of the Non-Hispanic White male                             | 0.429  | 0.643  | 0.494     | 0.017     |
| Percentage of the Non-Hispanic White female                           | 0.357  | 0.571  | 0.506     | 0.017     |
| Percentage of married Non-Hispanic White                              | 0.276  | 0.743  | 0.532     | 0.052     |

## 2.5 Statistical analysis

The main statistical analysis framework is presented in Figure 2. It includes five components. Each component aims to answer one research question proposed in Section 1.7.

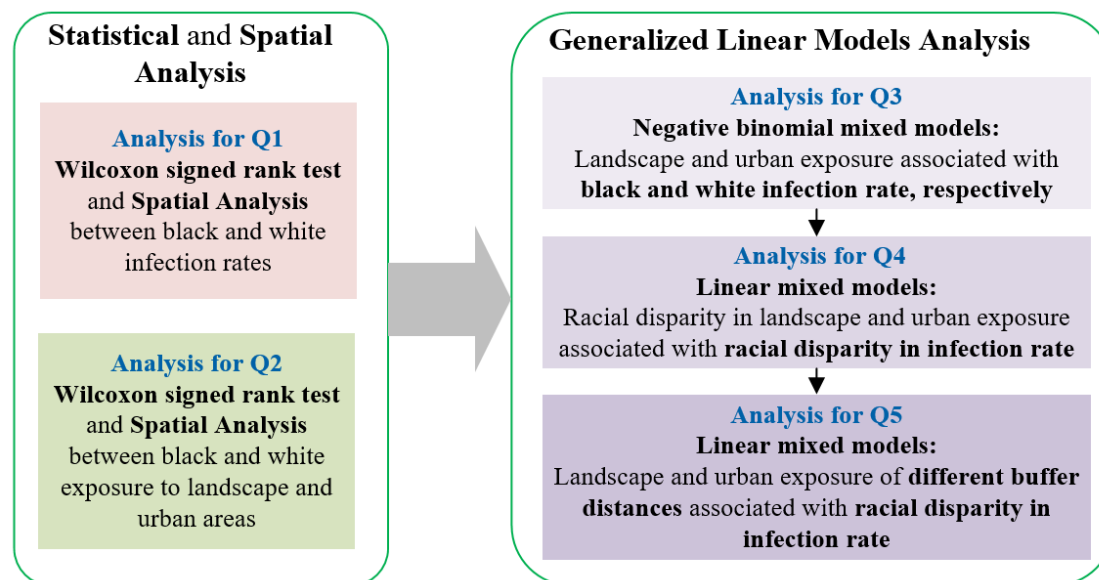

**Figure 2.** The framework of statistical analysis includes five components. Each component aimed to answer one of five proposed research questions.

First, we used the Wilcoxon signed rank test to examine whether there was a significant difference in SARS-CoV-2 infection rates between black and white people in the same county. We examined whether there was a significant difference between black and white people's exposure to landscape settings and urban areas with different development intensities in the same county. Second, we applied negative binomial regression models to investigate associations between landscape and urban exposures and people's SARS-CoV-2 infection rates. In the models, black infection rates and white infection rates were dependent variables, and socio-economic and demographic characteristics were covariates.

We also included a random intercept for states to account for the non-independence of data from the same state. Third, we adopted generalized linear mixed models to explore the extent to which the disparity of population landscape and urban exposure is related to racial disparity in SARS-CoV-2 infection rates, after accounting for covariates. In the models, the



relative differences between black and white infection rates were the dependent variables, and exposures to various landscape settings and urban areas between black and white people were the independent variables, while difference of socioeconomic and demographic characteristics between the two groups were included as covariates. We also included a random intercept by state to account for a potential correlation in counties within the same state.

A buffer distance of 400m was used to measure population-weighted landscape and urban exposure in all above models, since this buffer distance can be regarded as a convenient distance for most walking trips for people in the United States (Yang & Diez-Roux, 2012), and a common walking distance between residential locations (300m to 500m) and landscape settings, recommended by the World Health Organization (2016).

To address the issue of spatial autocorrelation in these models, we built additional simultaneous autoregressive models (SAR) to validate the results of these generalized linear models. In the first, we confirmed the presence of spatial autocorrelation in the models and then used a SAR model to adjust for the presence of spatial autocorrelation. We used the queen criteria to build the neighbors matrix and model selection with Akaike information criterion (AIC) to compare three potential structures for where the spatial autoregressive process is believed to occur. These potential structures include: a spatial error model, where spatial dependence is assumed to occur in the error term; a spatial lag model, where spatial dependence is assumed to occur in the response variable; and a mixed or Durbin model, where spatial dependence is assumed to influence both the response and explanatory variables.

Finally, we used a series of generalized linear mixed models to explore the relationship between the difference of black and white infection rates and varying buffer distances to landscape settings and urban areas with different levels of development intensity. Apart from

298 100m, the buffer distances varied from 200m to 1800m by intervals of 200m. For buffer  
 299 distances between 2km and 5km, we used intervals of 500m. We performed negative  
 300 binomial mixed models and generalized linear mixed analyses using R v4.1.1 with built-in  
 301 ‘glmer.nb’, and ‘lmer’ function, respectively (R Core Team, 2020). The inclusive variables  
 302 for all models were refined with the variance inflation factor criterion ( $VIF \geq 4$ ), to remove  
 303 multicollinearity from the regression (O’Brien, 2007). The model coefficient estimates,  
 304 standard errors, degree of freedom, t-values, and p-values for coefficient estimates were  
 305 reported.  
 306

## 3 Results

### 3.1 Whether and to what extent did a racial disparity in infection rates exist?

As of Dec. 31, 2020, there were a total of 4,370,477 cases among black and white people in the 1,416 sample counties of the United States (Figure 3a). The county average infection rate for white individuals was 2,579 persons per 100,000, whereas the infection rate for black individuals was 3,171 per 100,000 (Figure 3b). The average black-white difference in infection rate was 592 persons per 100,000 population. White individuals had a higher infection rate than black individuals in only 483 out of the 1416 counties. As expected, a Wilcoxon signed rank test revealed that the difference in infection rates between black and white people was significant,  $p < 0.001$ .

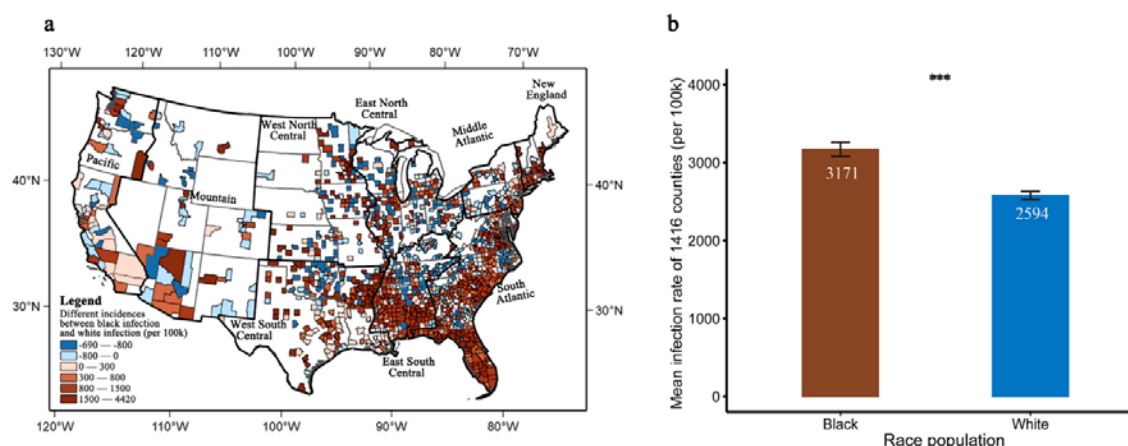

**Figure 3. Difference in SARS-CoV-2 infection rates between black and white people.**

a. Difference in infection rates between black and white people within counties (per 100k population). Blue color indicates that white people have a higher infection rate than black people, and red color indicates that black people have a higher infection rate than white people.

b. The mean SARS-CoV-2 infection rates between black and white population groups. The significant difference is identified at  $p < 0.001$  using Wilcoxon signed rank test. The error bar represents standard error of the mean.

### **3.2 Whether and to what extent did racial disparities in landscape and urban exposures exist?**

The Wilcoxon two-sample test found that, comparing with white people, black people had significantly lower exposure to multiple types of landscape settings, including forests, grassland/herbaceous, and pastures/hay. Additionally, black people had significantly higher exposure to urban areas with three different levels of development intensity (Figure 4 & Figure 5). The findings confirmed that there were significant and large racial disparities in landscape and urban exposure.

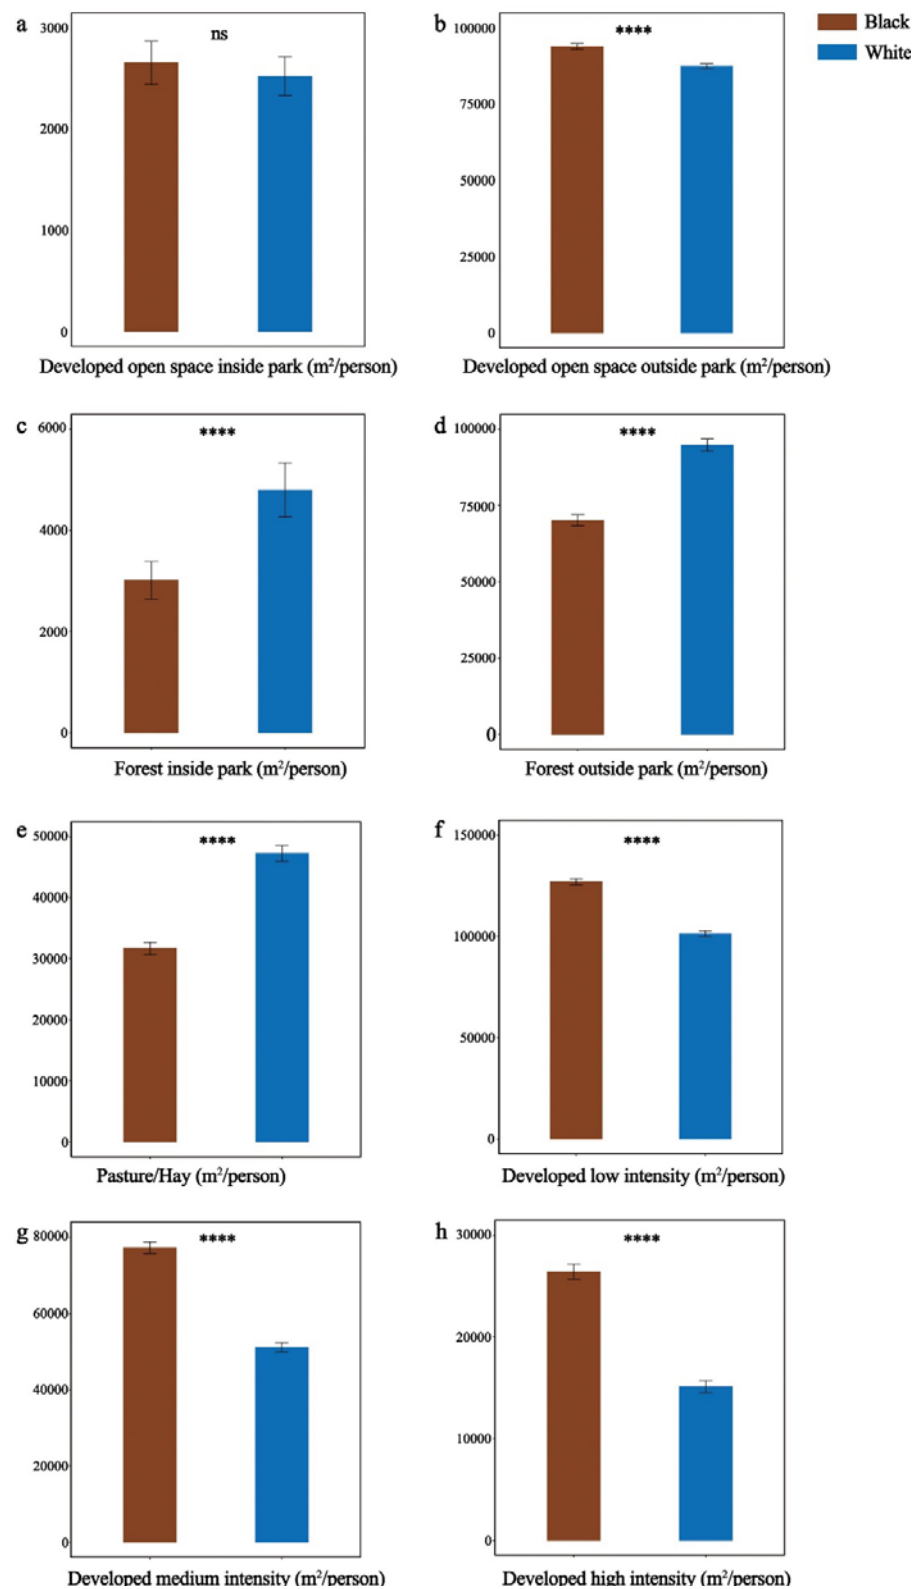

**Figure 4.** Comparisons of landscape and urban exposure between black and white people (within the 400 m buffer distance). A Wilcoxon two-sample test was used to compare eight types of landscape and urban exposure. The histogram shows mean values of exposure for black and white people in 1416 counties. The error bar represents standard error of the mean. '\*\*\*\*'  $p < 0.0001$ , 'ns'  $p \geq 0.1$ .

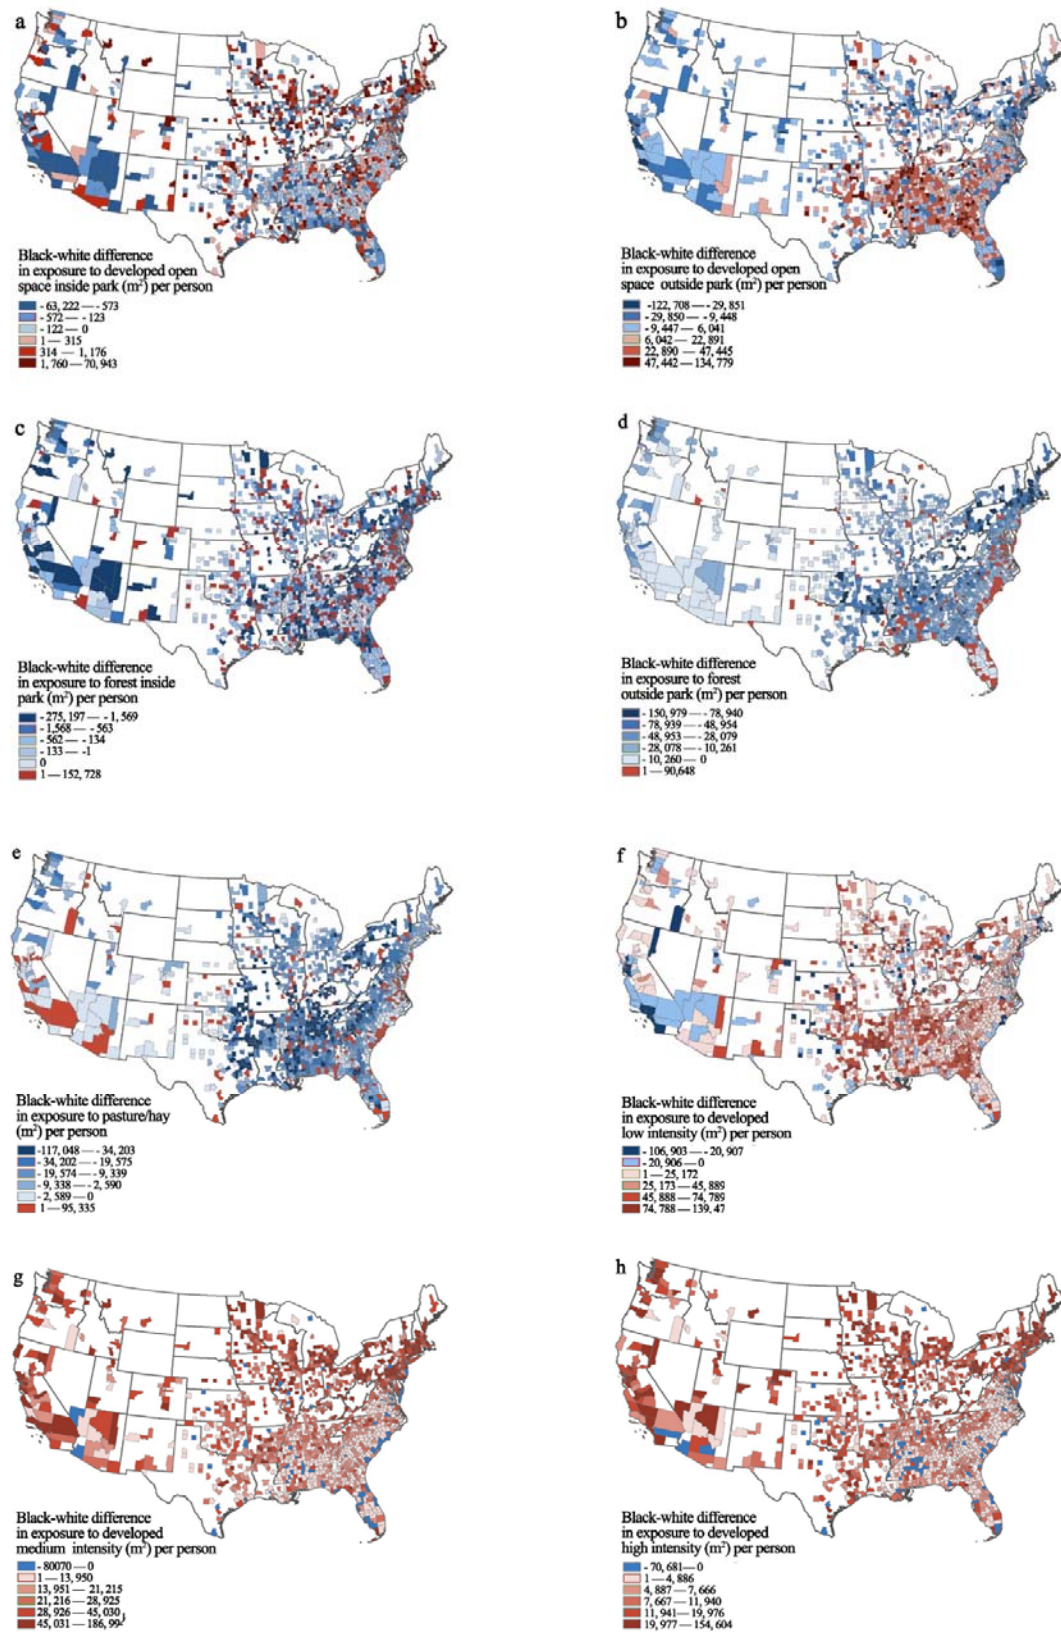

**Figure 5.** Within-county racial difference in landscape and urban exposure for each of 1416 counties (within the 400m buffer distance).

### 3.3 Whether and to what extent were landscape and urban exposures significantly associated with SARS-CoV-2 infection rates?

As shown in Figure 6, we identified several significant associations between landscape and urban exposure and SARS-CoV-2 infection rates for each race. For black people, both forest inside park and urban areas with medium development intensity yielded a significant and negative association with infection rates ( $p < 0.05$ ). For white people, forest outside park yielded a significant and negative association with infection rates ( $p < 0.05$ ). Urban areas with high development intensity yielded a significant and negative association with infection rates ( $p < 0.05$ ) (see detailed results in Supplementary Table S2).

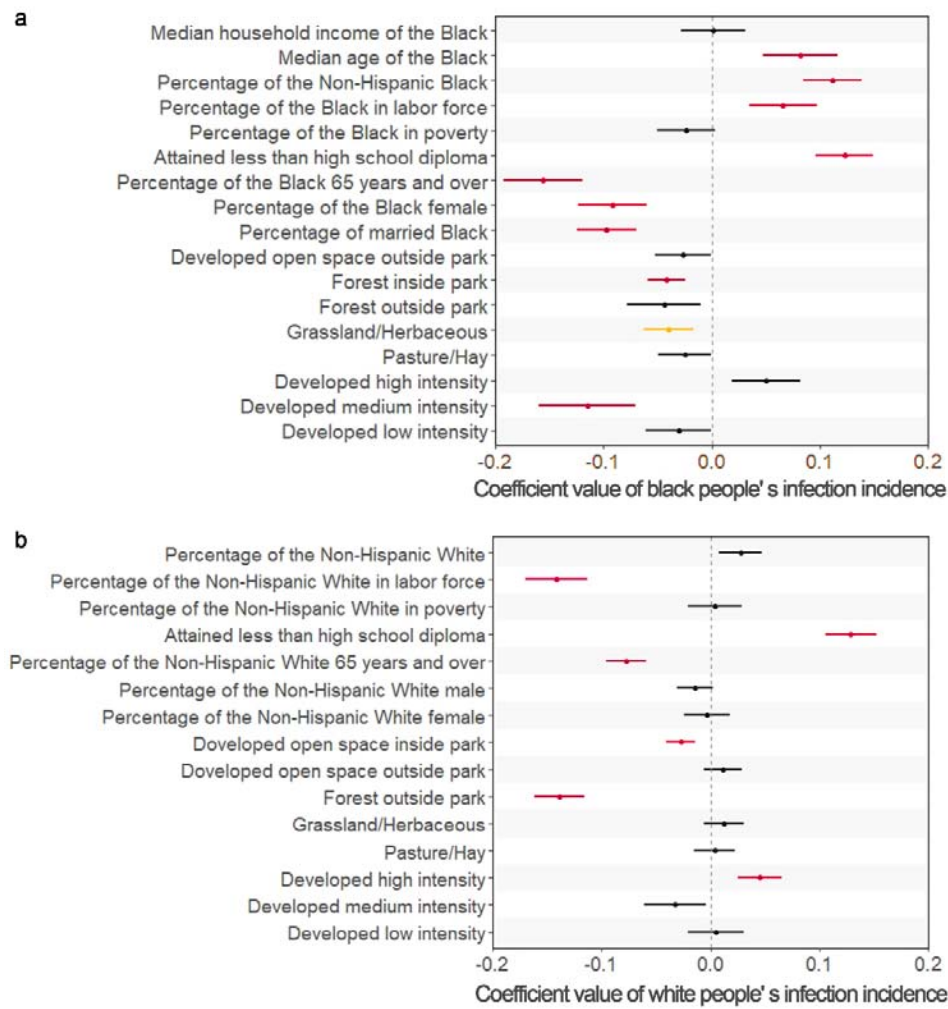



**Figure 6.** Coefficient values represent effect sizes from a negative binomial mixed effects model for the relationship between rates of COVID-19 black (a) or white (b) cases per 100,000 people, landscape exposure, urban exposure, and socioeconomic and demographic factors. The landscape and urban exposures were measured within the 400m buffer for each race.

Coefficient values (dots and bars) represent 95% CIs. Significant variables are shown in red ( $p < 0.05$ ), and marginally significant in yellow ( $p < 0.1$ ) to present associations between black or white exposure to green spaces and areas with different levels of development intensity, and black or white infection rate.

### 3.4 Whether and to what extent were racial disparities in landscape and urban exposures significantly associated with racial disparity in infection rates?

The generalized linear mixed effects model revealed a significantly negative correlation between exposure to forest outside park and pasture and racial disparity in COVID-19 cases. As shown in Table 2 & Figure 7, we identified a strong association between greenspace exposure and racial disparity of SARS-CoV-2 infection rates. A unit difference of forests outside parks between black and white populations had a significant association with a decrease of 8.83% in the racial disparity in infection rates ( $p < 0.001$ ). We found that the significant association of pasture/hay was associated with a decrease of 5.34% in the racial disparity in infection rates ( $p < 0.05$ ). The difference in exposure to development intensity exerted a mediating effect on SARS-CoV-2 infection rates decided by the levels of intensity. Overall, population exposure to developed urban areas with low ( $\beta = -0.073$ ,  $p < 0.01$ ) and medium intensities ( $\beta = -0.073$ ,  $p < 0.05$ ) was significantly associated with low racial disparity of infection rates (Figure 7).



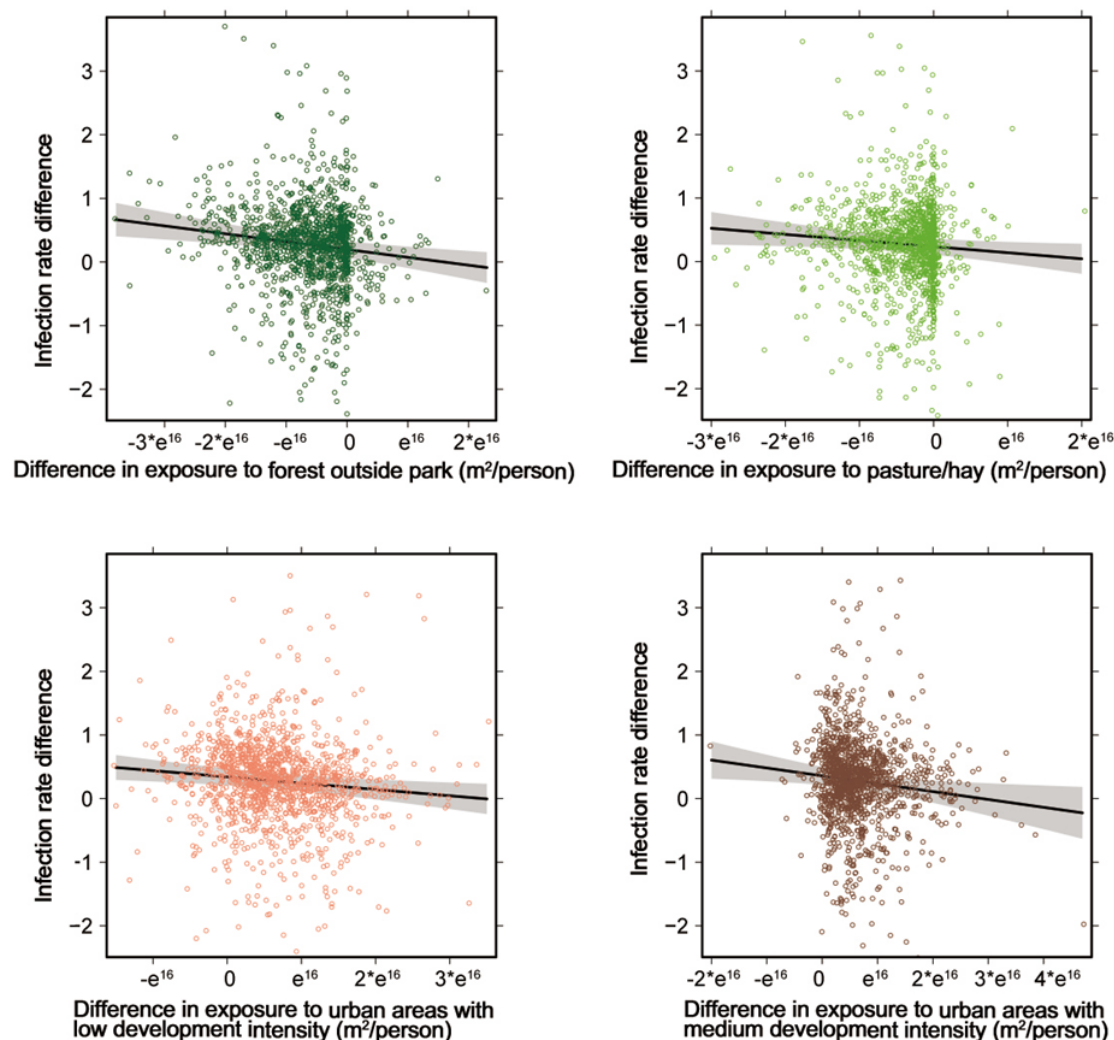

**Figure 7.** Green spaces and developed urban areas with developed intensities that have significant negative correlation with racial disparity of infection rate. The relative difference of infection rate between black and white population was calculated as  $\ln(\text{black cases}/100\text{k}) - \ln(\text{white cases}/100\text{k})$ .

**Table 2.** Model results from the generalized linear mixed effects model.

|                                                         | VIF  | Estimate | Std. Error | df    | t value | Pr( >  t  ) |
|---------------------------------------------------------|------|----------|------------|-------|---------|-------------|
| (Intercept)                                             |      | 0.264    | 0.06       | 38.15 | 4.18    | <0.001***   |
| Diff. in median household income                        | 1.49 | -0.046   | 0.02       | 1298  | -2.19   | 0.029*      |
| Diff. in median age                                     | 2.68 | 0.085    | 0.03       | 1311  | 2.70    | 0.007**     |
| Diff. in percentage of population                       | 1.29 | 0.194    | 0.02       | 1319  | 8.32    | <0.001***   |
| Diff. in percentage of population in labor force        | 2.28 | 0.087    | 0.03       | 1295  | 2.60    | 0.009**     |
| Diff. in percentage of the population in poverty        | 1.47 | -0.007   | 0.02       | 1299  | -0.31   | 0.76        |
| Diff. in attained less than high school diploma         | 1.34 | 0.100    | 0.02       | 1303  | 4.16    | <0.001***   |
| Diff. in percentage of the population 65 years and over | 2.7  | -0.126   | 0.03       | 1310  | -3.80   | <0.001***   |
| Diff. in percentage of female                           | 2.36 | 0.017    | 0.04       | 1311  | 0.48    | 0.634       |
| Diff. in percentage of married population               | 1.61 | -0.041   | 0.02       | 1312  | -1.68   | 0.093       |
| Diff. in developed open space inside park               | 1.36 | -0.007   | 0.02       | 1281  | -0.35   | 0.728       |
| Diff. in developed open space outside park              | 1.67 | -0.034   | 0.03       | 1288  | -1.33   | 0.183       |
| Diff. in Forest inside park                             | 1.35 | 0.005    | 0.03       | 1284  | 0.16    | 0.87        |
| Diff. in Forest outside park                            | 1.92 | -0.088   | 0.03       | 1317  | -3.37   | <0.001***   |
| Diff. in Grassland/Herbaceous                           | 1.15 | -0.019   | 0.02       | 1319  | -0.82   | 0.412       |
| Diff. in Pasture/Hay                                    | 1.62 | -0.053   | 0.02       | 1311  | -2.21   | 0.027*      |
| Diff. in high development intensity                     | 1.64 | 0.034    | 0.03       | 1312  | 1.30    | 0.195       |
| Diff. in medium development intensity                   | 1.93 | -0.073   | 0.03       | 1315  | -2.49   | 0.013*      |
| Diff. in low development intensity                      | 1.94 | -0.073   | 0.03       | 1305  | -2.74   | 0.006**     |

Note: Diff. means difference between black and white population. Both landscape exposure and urban exposure were measured within the 400 m buffer distance for each race.

### 3.5 Whether and how did the association between racial disparity in landscape and urban exposures and SARS-CoV-2 infection rates change as the buffer distance changed?

The results of sensitivity analysis of the four significant exposures found in 3.4 are shown in Figure 8 and Table 3. For the racial disparity in exposure to forest outside park, the buffer distance of best efficacy is 400m. The efficacy remains significant up until 1600m. For the racial disparity in exposure to pasture/hay, the buffer distance of best efficacy is 200m. The efficacy remains significant up until 400m. For the racial disparity in exposure to developed low intensity area, the buffer distance of best efficacy is 100m. The efficacy remains significant up until 600m. For the racial disparity in exposure to urban areas with moderate development intensity, the buffer distance of best efficacy is 600m, and the efficacy remains significant up until 1200m.

In total, all measures achieve a significant efficacy when the buffer distance is within

400m, which proves the validity of choosing 400m as the buffer distance for analysis in previous sections. Moreover, the beneficial associations gradually diminish as buffer distance increases. All become nonsignificant when the buffer distance is greater than 1600m.

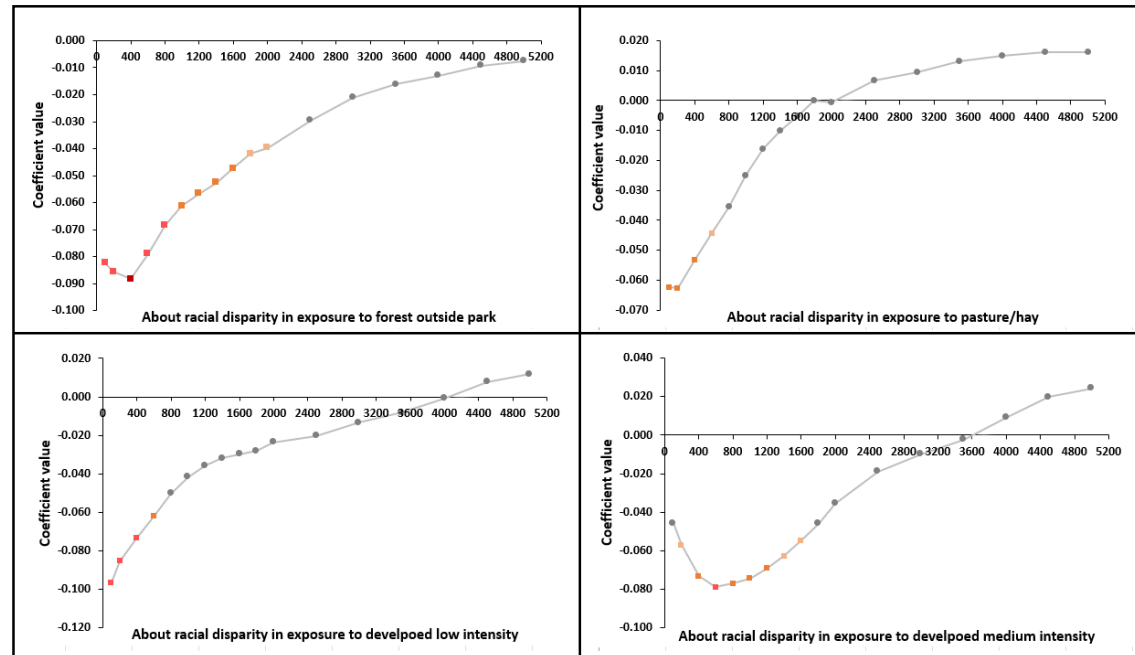

**Figure 8.** Coefficient values describing the associations between racial disparity in landscape and urban exposure within multiple buffer distances (100m-5km) and racial disparity in SARS-CoV-2 infection rates. Coefficient values are represented as dots with different colors. The gray color indicates nonsignificant associations,  $p \geq 0.1$ . Strong to light red colors indicate significant associations at different levels,  $p < 0.001$ ,  $p < 0.01$ ,  $p < 0.05$ , and  $p < 0.1$  (see detailed numbers in Table 3).

**Table 3.** Coefficient values describing the associations between racial disparity in landscape and urban exposure within multiple buffer distances (100m-5km) and racial disparity in SARS-CoV-2 infection rates. Significant levels are at <sup>ns</sup>  $p \geq 0.1$ , <sup>†</sup>  $p < 0.1$ , <sup>\*</sup>  $p < 0.05$ , <sup>\*\*</sup>  $p < 0.01$ , and <sup>\*\*\*</sup>  $p < 0.001$ .

| Buffer distance<br>(meter) | Landscape exposure     |             | Urban exposure                  |                              |
|----------------------------|------------------------|-------------|---------------------------------|------------------------------|
|                            | Forest outside<br>park | Pasture/hay | Medium development<br>intensity | Low development<br>intensity |
| 100                        | -0.082**               | -0.062*     | -0.046                          | -0.097**                     |
| 200                        | -0.086**               | -0.063*     | -0.057†                         | -0.085**                     |
| 400                        | -0.088***              | -0.053*     | -0.073*                         | -0.073**                     |
| 600                        | -0.079**               | -0.044†     | -0.079**                        | -0.062*                      |
| 800                        | -0.068**               | -0.035      | -0.077*                         | -0.050†                      |
| 1000                       | -0.061*                | -0.025      | -0.074*                         | -0.042                       |
| 1200                       | -0.057*                | -0.016      | -0.069*                         | -0.036                       |
| 1400                       | -0.053*                | -0.010      | -0.063†                         | -0.032                       |
| 1600                       | -0.047*                | -0.005      | -0.055†                         | -0.030                       |
| 1800                       | -0.042†                | 0.000       | -0.046                          | -0.028                       |
| 2000                       | -0.040†                | -0.001      | -0.036                          | -0.024                       |
| 2500                       | -0.030                 | 0.007       | -0.019                          | -0.020                       |
| 3000                       | -0.021                 | 0.010       | -0.010                          | -0.013                       |
| 3500                       | -0.016                 | 0.013       | -0.002                          | -0.008                       |
| 4000                       | -0.013                 | 0.015       | 0.009                           | -0.001                       |
| 4500                       | -0.009                 | 0.016       | 0.020                           | 0.008                        |
| 5000                       | -0.008                 | 0.016       | 0.024                           | 0.012                        |

## 4 Discussion

We present three major findings: (1) Racial disparity is profound: racial disparity in SARS-CoV-2 infection rates and racial disparity in landscape and urban exposure were significant and showed similar patterns. (2) Landscape and urban exposures impact racial disparity in SARS-CoV-2 infection rates. Less racial disparity in exposure to forests outside park and pasture/hay and urban areas with low and medium development intensities were significantly associated with lower racial disparities in SARS-CoV-2 infection rates. (3) Distance is critical: landscape and urban exposure within walking distance (around 400m) was significantly associated with racial disparity in SARS-CoV-2 infection rates.

The following discussion provides interpretations and implications of these major findings. We report limitations and recommend opportunities for future research.

### 4.1 Why was less racial disparity in landscape exposure associated with less racial disparity in infection rates?

**We describe four mechanisms that may explain the association.** First, less racial disparity in landscape exposure may lead to less disparity in air pollution exposure, which may contribute to lower racial disparity in infection rates. Recent studies have shown that air pollution is positively associated with higher COVID-19 mortality rates (Wu et al., 2020) and COVID-19 infection rates (Zhu et al., 2020) because COVID-19 is an airborne disease (Klompas et al., 2020). Studies found that a higher density of PM2.5, PM10, NO2, or O3 in the air was linked to a higher SARS-CoV-2 infection rate (Zhu et al., 2020). Less racial disparity in landscape exposure may reduce racial disparity in air pollution threats, thereby contributing to a lower racial disparity in SARS-CoV-2 infection rates (Mitchell & Popham, 2008; Wolch et al., 2014).

Second, less racial disparity in landscape exposure may lead to less racial disparity in engagement of outdoor physical activities, thereby contributing to a lower racial disparity in

SARS-CoV-2 infection rates (Lu, Chen, et al., 2021). A large number of studies have reported that landscape exposure encourages physical activity (Cox et al., 2017; Lu, Zhao, et al., 2021). More frequent physical activity can reduce the risk of obesity (Knobel et al., 2021; Kuo, 2013), cardiovascular diseases (Lanki et al., 2017), stroke (Wilker et al., 2014), systematic inflammation (Bikomeye et al., 2022), and promote immune functioning (da Silveira et al., 2021), making them less vulnerable to SARS-CoV-2 infection (Jiang et al., 2022).

Third, less racial disparity in landscape exposure may lead to less racial disparity in mental stress, thereby contributing to a lower racial disparity in SARS-CoV-2 infection rates. Many studies have shown that landscape exposure significantly reduces mental stress (Jiang et al., 2016; Sullivan & Li, 2021), and stress reduction boosts immune functioning (Kuo, 2015; Segerstrom & Miller, 2004). Studies report that landscape exposure boosts immune functioning by increasing the number of Natural Killer (NK) cells, lymphocytes, and enhanced human NK activities (Li et al., 2010; Li et al., 2008).

Fourth, less racial disparity in landscape exposure may lead to less racial disparity in outdoor social activities, thereby contributing to a lower racial disparity in SARS-CoV-2 infection rates. People with access to nearby landscapes can more easily engage in social activities while remaining at a safe social distance. Compared to indoor settings, outdoor landscape settings allow people to socialize with others at a much lower risk of contracting SARS-CoV-2. Outdoor settings provide high levels of air circulation and more room for social distancing (Leclerc et al., 2020; Miao et al., 2021; Vos et al., 2022).

#### **4.1.2 Why did racial disparity in forest exposure yield the strongest beneficial association with racial disparity in infection rates?**

Among all the landscape settings we analyzed, we found that lower racial disparity in population-level exposure to forests was most closely associated with a lower racial disparity

in SARS-CoV-2 infection rates. There are two possible explanations. First, forests (including trees along neighborhood streets) are more prevalent than other types of green spaces and distributed more evenly across urban and rural areas in the US (Yang et al., 2018). The relatively even distribution of forests among different neighborhoods provides both black and white population groups more opportunities for nature exposure.

Second, exposure to forests are more effective at reducing mental stress and negative emotions than exposure to other types of landscape (Beil & Hanes, 2013; Jiang et al., 2016), which may make them more effective at improving immune functioning and reducing systematic inflammation, further contributing to a stronger resistance to infection (Kuo, 2015; Li et al., 2010). Third, forests can more effectively capture particulate pollutants than grassland and shrubs because they have a more vertical and complex profile of foliage (Beckett et al., 2000). Exposure to forests is significantly associated with lower incidences of acute respiratory symptoms (Nowak et al., 2006; Nowak et al., 2018) and SARS-CoV-2 infection (Jiang et al., 2022; Lovasi et al., 2008). Lastly, compared to lawn, grassland, and open spaces, forests typically have more dense tree canopy, trunks, and narrow paths, which may encourage social distancing (Jiang et al., 2022). Previous studies have noted that the beneficial impacts of open spaces on SARS-CoV-2 infection (e.g., reduced air pollution and mental stress, enhanced physical activities) may be significantly offset by their detrimental impacts (e.g., increased social contact if people congregate in the open space). This impact may be more profound in dense urban areas (Yang et al., 2022).

### **4.1.3. Compared to forest inside parks, why does the racial disparity in forests outside parks have a stronger association with racial disparity in infection rates?**

There are several possible reasons. Previous studies argue that green spaces mediate health disparities among black and white people due to differences in how these groups interact with green spaces (Iyer et al., 2020). Compared to white people, black people in the US may use parks differently because they have historically been excluded from parks, especially moderate or large parks in suburban and rural areas (Byrne & Wolch, 2009; Wolch et al., 2014). Recent surveys of park users in the US report that black people often cite greater difficulties in using parks than white users, including feeling unwelcome, lacking free time, lacking a private vehicle, and financial stress caused by long-distance travel (Iyer et al., 2020; Wolch et al., 2014). Although black people may have a greater access than white people to urban parks in downtown areas, they experience more obstacles to accessing moderate and large parks in suburban and rural areas. Due to these obstacles, forests inside park may have a weaker impact on infection rates than forest outside park (Larson et al., 2021). In contrast, forests outside parks provide similar access to both black and white people, which allows the positive effect of forests on the SARS-CoV-2 infection can be equally applied to both black and white people.

Moreover, the area of forest outside parks for both races is much larger than the area of forest inside parks (Fig. 3: c and d). This may allow more people to maintain a safe social distance, which may lead to reduced infection (Jiang et al., 2022).

### **4.1.4 Why is lower racial disparity in low and medium intensity urban areas associated with a lower racial disparity in infection rates?**

We found that a higher racial disparity in low or medium development intensity areas were significantly associated with a lower racial disparity in infection rates while high development intensity areas did not yield a significant association with the racial disparity in

infection rates. There are several possible explanations for this finding.

First, many studies note that people living in high urban intensity areas have a higher risk of contracting viruses (Acuto et al., 2020; Teller, 2021). People living in these areas are often in close contact with people who may be infected, leading to a greater risk of exposure (Jamshidi et al., 2020; Kokubun & Yamakawa, 2021). Second, studies suggest that people in low and medium urban intensity areas are more likely to engage in outdoor activity than people in high intensity areas, thereby enhancing their immune functioning (Wang et al., 2021). Third, people living in high urban intensity areas have higher levels of stress (Luo & Jiang, 2022). People suffering from stress often have higher levels of cortisol, which can inhibit the production of lymphocytes, which are a type of white blood cell that can help people resist viruses, including SARS-CoV-2 (Jiang et al., 2014; Maydych et al., 2017; Ryden et al., 2009). Lastly, people living in high urban intensity areas may have lower levels of social capital (e.g., Eriksson & Rataj, 2019; Rupasingha et al., 2006). Social capital has been proven to negatively correlate with SARS-CoV-2 infection rates and population density (Kokubun & Yamakawa, 2021). People living in low or moderate density areas may have more equitable access to public spaces and facilities where they can socialize and collaborate. Social capital is critical for actions that require residents to work together to reduce the severity of pandemic, such as wearing masks and social distancing (Watanabe et al., 2022).

## 4.2 Implications

Our findings suggest four major landscape and urban planning implications. First, this study found significant and large racial disparities in both SARS-CoV-2 infection rates and landscape and urban exposures. Furthermore, we found a high level of agreement between the two types of racial disparity. To address this racial disparity, governments should allocate public resources to add vegetation and improve access to natural landscapes in areas with higher concentrations of minority populations. City planners should also work to design less



crowded urban environments in these areas to reduce racial disparity in public health outcomes.

Second, we found that different landscape settings and urban development intensities had different associations with SARS-CoV-2 infection rates and with racial disparity in SARS-CoV-2 infection rates. These findings suggest that we should not treat all landscape and urban development types the same when allocating public resources. City administrators, planning and design professionals, and public health professionals need to understand what types of landscape settings and urban development intensities may significantly reduce the risk of SARS-CoV-2 infection.

Third, this study suggests that distance to landscape settings and urban areas impacts their association with SARS-CoV-2 infection. The beneficial effects of forest outside park, pasture/hay, and urban areas with low and moderate development intensity are greatest when they are within a comfortable walking distance (radius buffer under 400m). The effects diminish as distance increases, eventually becoming nonsignificant. These findings suggest that governments should allocate more resources to preserve and develop natural landscapes and areas with low and moderate development intensity within walking distance.

Fourth, this study calls for interdisciplinary cooperation between urban planners and landscape architects. Previous studies typically examine either landscape settings or urban areas because these two types of environments might be essentially complementary, so it is not necessary to examine their effects in the same study, but we found, after controlling for multicollinearity, that both landscape exposure and urban exposure yielded significant associations. Planners should consider landscape and urban exposure as two equally important tools to alleviate risk of SARS-CoV-2 infection and other airborne infectious diseases.

### 4.3 Limitations and future research

This study has two major limitations, which suggest opportunities for future study. First, because we used aggregated SARS-CoV-2 infection data, this study was essentially vulnerable to the ecological fallacy. To largely reduce the risk of ecological fallacy, we used fine-scaled racial map data, population-weighted analysis for landscape and urban exposure at a fine scale, and a within-county comparison of racial disparities in environmental exposures and infection rates. Nevertheless, the environmental exposures and infection rates data at the individual level can improve the accuracy of the findings and should be encouraged to be used in future studies when those data are available.

Moreover, this study identifies a correlational relationship between the racial disparity of landscape and urban exposure and the racial disparity of infection rates. Theoretical and empirical findings from previous studies suggest that there may be a causal relationship. We suggest that future researchers should consider conducting natural experimental studies, environmental intervention studies, or cohort studies to explore more of the possible causal relationship (Jiang et al., 2021).

### Conclusion

The philosopher Georg Hegel said, “The only thing that we learn from history is that we learn nothing from history.” Although many people believe the COVID-19 pandemic is over, we haven’t fully understood it and we haven’t learned enough from it. This nationwide study provides evidence to guide landscape and urban planning to alleviate racial disparities in landscape and urban exposure and SARS-CoV-2 infection rates. Governments, urban planners, landscape planners, and public health professionals should work together to provide more equitable access to certain types of landscape settings and urban areas to reduce risk of infections for all races. In all, we are positive that our findings can contribute to solve similar public health and social crisis in the near or far future.

## References

- Abedi, V., Olulana, O., Avula, V., Chaudhary, D., Khan, A., Shahjouei, S., Li, J., & Zand, R. (2020). Racial, Economic and Health Inequality and COVID-19 Infection in the United States. *medRxiv : the preprint server for health sciences*, 2020.2004.2026.20079756. <https://doi.org/10.1101/2020.04.26.20079756>
- Acuto, M., Larcom, S., Keil, R., Ghajeh, M., Lindsay, T., Camponeschi, C., & Parnell, S. (2020). Seeing COVID-19 through an urban lens. *Nature Sustainability*, 3(12), 977-978. <https://doi.org/10.1038/s41893-020-00620-3>
- Alidadi, M., & Sharifi, A. (2022). Effects of the built environment and human factors on the spread of COVID-19: A systematic literature review. *Science of The Total Environment*, 158056.
- Beckett, K. P., Freer-Smith, P., & Taylor, G. (2000). Particulate pollution capture by urban trees: effect of species and windspeed. *Global Change Biology*, 6(8), 995-1003.
- Beil, K., & Hanes, D. (2013). The Influence of Urban Natural and Built Environments on Physiological and Psychological Measures of Stress-A Pilot Study [Article]. *International Journal of Environmental Research and Public Health*, 10(4), 1250-1267. <https://doi.org/10.3390/ijerph10041250>
- Bikomeye, J. C., Beyer, A. M., Kwarteng, J. L., & Beyer, K. M. M. (2022). Greenspace, Inflammation, Cardiovascular Health, and Cancer: A Review and Conceptual Framework for Greenspace in Cardio-Oncology Research. *Int J Environ Res Public Health*, 19(4). <https://doi.org/10.3390/ijerph19042426>
- Branas, C. C., South, E., Kondo, M. C., Hohl, B. C., Bourgois, P., Wiebe, D. J., & MacDonald, J. M. (2018). Citywide cluster randomized trial to restore blighted vacant land and its effects on violence, crime, and fear [10.1073/pnas.1718503115]. *Proceedings of the National Academy of Sciences*. <http://www.pnas.org/content/early/2018/02/20/1718503115.abstract>
- Braveman, P. A., Kumanyika, S., Fielding, J., LaVeist, T., Borrell, L. N., Manderscheid, R., & Troutman, A. (2011). Health disparities and health equity: the issue is justice. *American journal of public health*, 101(S1), S149-S155. <https://doi.org/10.2105/Ajph.2010.300062>
- Byrne, J., & Wolch, J. (2009). Nature, race, and parks: past research and future directions for geographic research. *Progress in human geography*, 33(6), 743-765. <https://doi.org/10.1177/0309132509103156>
- Centers for Disease Control and Prevention, C.-R. (2021). COVID-19 Response. COVID-19 Case Surveillance Data Access, Summary, and Limitations (version date: June 21, 2021).
- Chen, B., Song, Y., Jiang, T., Chen, Z., Huang, B., & Xu, B. (2018). Real-time estimation of population exposure to PM2. 5 using mobile-and station-based big data. *International Journal of Environmental Research and Public Health*, 15(4), 573.
- Chen, B., Song, Y., Kwan, M.-P., Huang, B., & Xu, B. (2018). How do people in different places experience different levels of air pollution? Using worldwide Chinese as a lens. *Environmental pollution*, 238, 874-883.
- Chen, B., Tu, Y., Wu, S., Song, Y., Jin, Y., Webster, C., Xu, B., & Gong, P. (2022). Beyond green

environments: Multi-scale difference in human exposure to greenspace in China. *Environ Int*, 166, 107348.

Cox, D. T., Shanahan, D. F., Hudson, H. L., Fuller, R. A., Anderson, K., Hancock, S., & Gaston, K. J. (2017). Doses of Nearby Nature Simultaneously Associated with Multiple Health Benefits. *Int J Environ Res Public Health*, 14(2). <https://doi.org/10.3390/ijerph14020172>

da Silveira, M. P., da Silva Fagundes, K. K., Bizuti, M. R., Starck, É., Rossi, R. C., & de Resende, E. S. D. T. (2021). Physical exercise as a tool to help the immune system against COVID-19: an integrative review of the current literature. *Clin Exp Med*, 21(1), 15-28. <https://doi.org/10.1007/s10238-020-00650-3>

Das, M., Pal, S., & Ghosh, A. (2008). Rural urban differences of cardiovascular disease risk factors in adult Asian Indians. *American Journal of Human Biology*, 20(4), 440-445. <https://doi.org/10.1002/ajhb.20757>

Dmowska, A., & Stepinski, T. F. (2019). Racial Dot Maps Based on Dasymmetrically Modeled Gridded Population Data. *Social Sciences*, 8(5), 157. <https://www.mdpi.com/2076-0760/8/5/157>

Dmowska, A., Stepinski, T. F., & Netzel, P. (2017). Comprehensive framework for visualizing and analyzing spatio-temporal dynamics of racial diversity in the entire United States. *PLOS ONE*, 12(3), e0174993. <https://doi.org/10.1371/journal.pone.0174993>

Eriksson, R., & Rataj, M. (2019). The geography of starts-ups in Sweden. The role of human capital, social capital and agglomeration. *Entrepreneurship & Regional Development*, 31(9-10), 735-754.

Figueroa, J. F., Wadhera, R. K., Lee, D., Yeh, R. W., & Sommers, B. D. (2020). Community-Level Factors Associated With Racial And Ethnic Disparities In COVID-19 Rates In Massachusetts. *The New York Times*, 39(11), 1984-1992. <https://doi.org/10.1377/hlthaff.2020.01040>

Firebaugh, G. (2001). Ecological Fallacy, Statistics of. In N. J. Smelser & P. B. Baltes (Eds.), *International Encyclopedia of the Social & Behavioral Sciences* (pp. 4023-4026). Pergamon. <https://doi.org/https://doi.org/10.1016/B0-08-043076-7/00765-8>

Iyer, H. S., Valeri, L., James, P., Chen, J. T., Hart, J. E., Laden, F., Holmes, M. D., & Rebbeck, T. R. (2020). The contribution of residential greenness to mortality among men with prostate cancer: a registry-based cohort study of Black and White men. *Environmental Epidemiology*, 4(2).

Jamshidi, S., Baniasad, M., & Niyogi, D. (2020). Global to USA County Scale Analysis of Weather, Urban Density, Mobility, Homestay, and Mask Use on COVID-19. *International Journal of Environmental Research and Public Health*, 17(21), 7847. <https://doi.org/10.3390/ijerph17217847>

Jauho, M., & Helén, I. (2022). Citizenship by vitality: rethinking the concept of health citizenship. *Distinktion: Journal of Social Theory*, 1-21. <https://doi.org/10.1080/1600910X.2022.2057561>

Jiang, B., Chang, C.-Y., & Sullivan, W. C. (2014). A dose of nature: Tree cover, stress reduction, and gender differences. *Landscape and Urban Planning*, 132(0), 26-36. <https://doi.org/http://dx.doi.org/10.1016/j.landurbplan.2014.08.005>

Jiang, B., Li, D. Y., Larsen, L., & Sullivan, W. C. (2016). A Dose-Response Curve Describing the

Relationship Between Urban Tree Cover Density and Self-Reported Stress Recovery.  
*Environment and Behavior*, 48(4), 607-629. <https://doi.org/10.1177/0013916514552321>

Jiang, B., Xu, W. Y., Ji, W. Q., Kim, G., Pryor, M., & Sullivan, W. C. (2021). Impacts of nature and built acoustic-visual environments on human's multidimensional mood states: A cross-continent experiment. *Journal of Environmental Psychology*, 77, 101659.  
<https://doi.org/10.1016/j.jenvp.2021.101659>

Jiang, B., Yang, Y., Chen, L., Liu, X., Wu, X., Chen, B., Webster, C., Sullivan, W. C., Larsen, L., Wang, J., & Lu, Y. (2022). Green spaces, especially nearby forest, may reduce the SARS-CoV-2 infection rate: A nationwide study in the United States. *Landscape and Urban Planning*, 228, 104583. <https://doi.org/10.1016/j.landurbplan.2022.104583>

Knobel, P., Maneja, R., Bartoll, X., Alonso, L., Bauwelinck, M., Valentin, A., Zijlema, W., Borrell, C., Nieuwenhuijsen, M., & Dadvand, P. (2021). Quality of urban green spaces influences residents' use of these spaces, physical activity, and overweight/obesity. *Environmental pollution*, 271, 116393.

Kokubun, K., & Yamakawa, Y. (2021). Social Capital Mediates the Relationship between Social Distancing and COVID-19 Prevalence in Japan. *INQUIRY: The Journal of Health Care Organization, Provision, and Financing*, 58, 00469580211005189.  
<https://doi.org/10.1177/00469580211005189>

Kuo, F. E. M. (2013). Nature-deficit disorder: evidence, dosage, and treatment. *Journal of Policy Research in Tourism, Leisure and Events*, 5(2), 172-186.  
<https://doi.org/10.1080/19407963.2013.793520>

Kuo, M. (2015). How might contact with nature promote human health? Promising mechanisms and a possible central pathway. *Frontiers in psychology*, 1093.

Lanki, T., Siponen, T., Ojala, A., Korpela, K., Pennanen, A., Tiittanen, P., Tsunetsugu, Y., Kagawa, T., & Tyrväinen, L. (2017). Acute effects of visits to urban green environments on cardiovascular physiology in women: A field experiment. *Environmental Research*, 159, 176-185.  
<https://doi.org/10.1016/j.envres.2017.07.039>

Larson, L. R., Zhang, Z., Oh, J. I., Beam, W., Ogletree, S. S., Bocarro, J. N., Lee, K. J., Casper, J., Stevenson, K. T., Hipp, J. A., Mullenbach, L. E., Carusona, M., & Wells, M. (2021). Urban Park Use During the COVID-19 Pandemic: Are Socially Vulnerable Communities Disproportionately Impacted? [Original Research]. *Frontiers in Sustainable Cities*, 3(103).  
<https://doi.org/10.3389/frsc.2021.710243>

Leclerc, Q., Fuller, N., Knight, L., null, n., Funk, S., & Knight, G. (2020). What settings have been linked to SARS-CoV-2 transmission clusters? [version 2; peer review: 2 approved]. *Wellcome Open Research*, 5(83). <https://doi.org/10.12688/wellcomeopenres.15889.2>

Li, Q., Kobayashi, M., Inagaki, H., Hirata, Y., Li, Y. J., Hirata, K., Shimizu, T., Suzuki, H., Katsumata, M., Wakayama, Y., Kawada, T., Ohira, T., Matsui, N., & Kagawa, T. (2010). A day trip to a forest park increases human natural killer activity and the expression of anti-cancer proteins in male subjects. *J Biol Regul Homeost Agents*, 24(2), 157-165.

693 Li, Q., Morimoto, K., Kobayashi, M., Inagaki, H., Katsumata, M., Hirata, Y., Hirata, K., Suzuki, H., Li, Y.  
694 J., Wakayama, Y., Kawada, T., Park, B. J., Ohira, T., Matsu, N., Kagawa, T., Miyazaki, Y., &  
695 Krensky, A. M. (2008). Visiting a forest, but not a city, increases human natural killer activity  
696 and expression of anti-cancer proteins. *International Journal of Immunopathology and*  
697 *Pharmacology*, 21(1), 117-127. <Go to ISI>://WOS:000254686700013  
698 Lin, C., Lau, A. K. H., Fung, J. C. H., Guo, C., Chan, J. W. M., Yeung, D. W., Zhang, Y., Bo, Y.,  
699 Hossain, M. S., Zeng, Y., & Lao, X. Q. (2020). A mechanism-based parameterisation scheme  
700 to investigate the association between transmission rate of COVID-19 and meteorological  
701 factors on plains in China. *Science of The Total Environment*, 737, 140348.  
702 <https://doi.org/10.1016/j.scitotenv.2020.140348>  
703 Lovasi, G. S., Quinn, J. W., Neckerman, K. M., Perzanowski, M. S., & Rundle, A. (2008). Children  
704 living in areas with more street trees have lower prevalence of asthma. *Journal of*  
705 *Epidemiology & Community Health*, 62(7), 647-649.  
706 Lu, Y., Chen, L., Liu, X., Yang, Y., Sullivan, W. C., Xu, W., Webster, C., & Jiang, B. (2021). Green  
707 spaces mitigate racial disparity of health: A higher ratio of green spaces indicates a lower  
708 racial disparity in SARS-CoV-2 infection rates in the USA. *Environ Int*, 152, 106465.  
709 <https://doi.org/10.1016/j.envint.2021.106465>  
710 Lu, Y., Zhao, J., Wu, X., & Lo, S. M. (2021). Escaping to nature during a pandemic: A natural  
711 experiment in Asian cities during the COVID-19 pandemic with big social media data. *Science*  
712 *of The Total Environment*, 777, 146092. <https://doi.org/10.1016/j.scitotenv.2021.146092>  
713 Luo, L., & Jiang, B. (2022). From oppressiveness to stress: A development of Stress Reduction  
714 Theory in the context of contemporary high-density city. *Journal of Environmental Psychology*,  
715 101883. <https://doi.org/https://doi.org/10.1016/j.jenvp.2022.101883>  
716 Maydych, V., Claus, M., Dychus, N., Ebel, M., Damaschke, J., Diestel, S., Wolf, O. T., Kleinsorge, T.,  
717 & Watzl, C. (2017). Impact of chronic and acute academic stress on lymphocyte subsets and  
718 monocyte function. *Plos One*, 12(11), e0188108.  
719 <https://doi.org/10.1371/journal.pone.0188108>  
720 McMichael, A. J. (2000). The urban environment and health in a world of increasing globalization:  
721 issues for developing countries. *Bulletin of the world Health Organization*, 78, 1117-1126.  
722 Miao, J., Zeng, D., & Shi, Z. (2021). Can neighborhoods protect residents from mental distress during  
723 the COVID-19 pandemic? Evidence from Wuhan. *Chinese Sociological Review*, 53(1), 1-26.  
724 Mitchell, R., & Popham, F. (2008). Effect of exposure to natural environment on health inequalities: an  
725 observational population study. *Lancet*, 372(9650), 1655-1660. [https://doi.org/10.1016/s0140-](https://doi.org/10.1016/s0140-6736(08)61689-x)  
726 [6736\(08\)61689-x](https://doi.org/10.1016/s0140-6736(08)61689-x)  
727 Mouratidis, K., & Poortinga, W. (2020). Built environment, urban vitality and social cohesion: Do  
728 vibrant neighborhoods foster strong communities? *Landscape and Urban Planning*, 204,  
729 103951. <https://doi.org/https://doi.org/10.1016/j.landurbplan.2020.103951>  
730 Nowak, D. J., Crane, D. E., & Stevens, J. C. (2006). Air pollution removal by urban trees and shrubs  
731 in the United States. *Urban Forestry and Urban Greening*, 4(3-4), 115-123.

732 [http://www.scopus.com/inward/record.url?eid=2-s2.0-](http://www.scopus.com/inward/record.url?eid=2-s2.0-33746240855&partnerID=40&md5=9709d937f0a077a0d2ecb6220e504415)  
733 [33746240855&partnerID=40&md5=9709d937f0a077a0d2ecb6220e504415](http://www.scopus.com/inward/record.url?eid=2-s2.0-33746240855&partnerID=40&md5=9709d937f0a077a0d2ecb6220e504415)  
734 Nowak, D. J., Hirabayashi, S., Doyle, M., McGovern, M., & Pasher, J. (2018). Air pollution removal by  
735 urban forests in Canada and its effect on air quality and human health. *Urban Forestry &*  
736 *Urban Greening*, 29, 40-48. [https://doi.org/https://doi.org/10.1016/j.ufug.2017.10.019](https://doi.org/10.1016/j.ufug.2017.10.019)  
737 O'brien, R. M. (2007). A caution regarding rules of thumb for variance inflation factors. *Quality &*  
738 *quantity*, 41(5), 673-690.  
739 Paköz, M. Z., & Işık, M. (2022). Rethinking urban density, vitality and healthy environment in the post-  
740 pandemic city: The case of Istanbul. *Cities*, 124, 103598.  
741 <https://doi.org/https://doi.org/10.1016/j.cities.2022.103598>  
742 Rupasingha, A., Goetz, S. J., & Freshwater, D. (2006). The production of social capital in US counties.  
743 *The Journal of Socio-Economics*, 35(1), 83-101. <https://doi.org/10.1016/j.socec.2005.11.001>  
744 Ryden, M., Hedback, B., & Jonasson, L. (2009). Does Stress Reduction Change the Levels of Cortisol  
745 Secretion in Patients With Coronary Artery Disease? [Article]. *Journal of Cardiopulmonary*  
746 *Rehabilitation and Prevention*, 29(5), 314-317. <Go to ISI>://000270599400007  
747 Segerstrom, S. C., & Miller, G. E. (2004). Psychological stress and the human immune system: a  
748 meta-analytic study of 30 years of inquiry. *Psychological bulletin*, 130(4), 601.  
749 Son, J.-Y., Lane, K. J., Miranda, M. L., & Bell, M. L. (2020). Health disparities attributable to air  
750 pollutant exposure in North Carolina: Influence of residential environmental and social factors.  
751 *Health & place*, 62, 102287.  
752 Song, Y., Chen, B., Ho, H. C., Kwan, M.-P., Liu, D., Wang, F., Wang, J., Cai, J., Li, X., Xu, Y., He, Q.,  
753 Wang, H., Xu, Q., & Song, Y. (2021). Observed inequality in urban greenspace exposure in  
754 China. *Environ Int*, 156, 106778. <https://doi.org/10.1016/j.envint.2021.106778>  
755 Spotswood, E., Benjamin, M., Stoneburner, L., Wheeler, M., Beller, E., Balk, D., McPhearson, T., Kuo,  
756 M., & McDonald, R. (2021). Nature inequity and higher COVID-19 case rates in less-green  
757 neighbourhoods in the United States. *Nature Sustainability* (4), 1092–1098.  
758 <https://doi.org/10.1038/s41893-021-00781-9>  
759 Sullivan, W. C., & Li, D. (2021). Nature and Attention. In A. R. Schutte, J. C. Torquati, & J. R. Stevens  
760 (Eds.), *Nature and Psychology : Biological, Cognitive, Developmental, and Social Pathways*  
761 *to Well-being* (pp. 7-30). Springer International Publishing. [https://doi.org/10.1007/978-3-030-](https://doi.org/10.1007/978-3-030-69020-5_2)  
762 [69020-5\\_2](https://doi.org/10.1007/978-3-030-69020-5_2)  
763 Teller, J. (2021). Urban density and Covid-19: towards an adaptive approach. *Buildings and Cities*,  
764 2(1), 150-165.  
765 Ulrich, R. (1984). View through a window may influence recovery from surgery. *Science*, 224.  
766 <https://doi.org/10.1126/science.6143402>  
767 Venkatramana, P., & Reddy, P. C. (2002). Association of overall and abdominal obesity with coronary  
768 heart disease risk factors: comparison between urban and rural Indian men. *Asia Pacific*  
769 *Journal of Clinical Nutrition*, 11(1), 66-71. [https://doi.org/DOI.10.1046/j.1440-](https://doi.org/DOI.10.1046/j.1440-6047.2002.00250.x)  
770 [6047.2002.00250.x](https://doi.org/DOI.10.1046/j.1440-6047.2002.00250.x)

- 771 Vos, S., Bijmens, E. M., Renaers, E., Croons, H., Van Der Stukken, C., Martens, D. S., Plusquin, M., &  
772 Nawrot, T. S. (2022). Residential green space is associated with a buffering effect on stress  
773 responses during the COVID-19 pandemic in mothers of young children, a prospective study.  
774 *Environmental research*, 208, 112603. <https://doi.org/10.1016/j.envres.2021.112603>
- 775 Wang, J., Yang, Y., Peng, J., Yang, L., Gou, Z., & Lu, Y. (2021). Moderation effect of urban density on  
776 changes in physical activity during the coronavirus disease 2019 pandemic. *Sustainable*  
777 *Cities and Society*, 72, 103058. <https://doi.org/10.1016/j.scs.2021.103058>
- 778 Watanabe, J.-i., Kimura, T., Nakamura, T., Suzuki, D., Takemoto, T., & Tamakoshi, A. (2022).  
779 Associations of social capital and health at a city with high aging rate and low population  
780 density. *SSM - Population Health*, 17, 100981. <https://doi.org/10.1016/j.ssmph.2021.100981>
- 781 Wilker, E. H., Wu, C. D., McNeely, E., Mostofsky, E., Spengler, J., Wellenius, G. A., & Mittleman, M. A.  
782 (2014). Green space and mortality following ischemic stroke. *Environ Res*, 133, 42-48.  
783 <https://doi.org/10.1016/j.envres.2014.05.005>
- 784 Wolch, J. R., Byrne, J., & Newell, J. P. (2014). Urban green space, public health, and environmental  
785 justice: The challenge of making cities 'just green enough'. *Landscape and Urban Planning*,  
786 125, 234-244. <https://doi.org/10.1016/j.landurbplan.2014.01.017>
- 787 Woodruff, S., Vitro, K. A., & BenDor, T. K. (2018). 2.11 - GIS and Coastal Vulnerability to Climate  
788 Change. In B. Huang (Ed.), *Comprehensive Geographic Information Systems* (pp. 236-257).  
789 Elsevier. <https://doi.org/https://doi.org/10.1016/B978-0-12-409548-9.09655-X>
- 790 World Health Organization. (2010). *World health statistics 2010*. World Health Organization.  
791 <https://www.who.int/publications-detail-redirect/9789241564021>
- 792 World Health Organization. (2016). *Urban green spaces and health - a review of evidence*  
793 [http://www.euro.who.int/data/assets/pdf\\_file/0005/321971/Urban-green-spacesand-health-](http://www.euro.who.int/data/assets/pdf_file/0005/321971/Urban-green-spacesand-health-review-evidence.pdf?ua=1)  
794 [review-evidence.pdf?ua=1](http://www.euro.who.int/data/assets/pdf_file/0005/321971/Urban-green-spacesand-health-review-evidence.pdf?ua=1)
- 795 Wu, X., Nethery, R. C., Sabath, M. B., Braun, D., & Dominici, F. (2020). Air pollution and COVID-19  
796 mortality in the United States: Strengths and limitations of an ecological regression analysis.  
797 *Science advances*, 6(45), eabd4049. <https://doi.org/10.1126/sciadv.abd4049>
- 798 Yang, L., Jin, S., Danielson, P., Homer, C., Gass, L., Bender, S. M., Case, A., Costello, C., Dewitz, J.,  
799 Fry, J., Funk, M., Granneman, B., Liknes, G. C., Rigge, M., & Xian, G. (2018). A new  
800 generation of the United States National Land Cover Database: Requirements, research  
801 priorities, design, and implementation strategies. *ISPRS journal of photogrammetry and*  
802 *remote sensing*, 146, 108-123. <https://doi.org/10.1016/j.isprsjprs.2018.09.006>
- 803 Yang, Y., & Diez-Roux, A. V. (2012). Walking Distance by Trip Purpose and Population Subgroups.  
804 *Am J Prev Med*, 43(1), 11-19. <https://doi.org/10.1016/j.amepre.2012.03.015>
- 805 Yang, Y., Lu, Y., & Jiang, B. (2022). Population-weighted exposure to green spaces tied to lower  
806 COVID-19 mortality rates: A nationwide dose-response study in the USA. *Science of The*  
807 *Total Environment*, 851, 158333.  
808 <https://doi.org/https://doi.org/10.1016/j.scitotenv.2022.158333>
- 809 Zhang, C. H., & Schwartz, G. G. (2020). Spatial Disparities in Coronavirus Incidence and Mortality in



810 the United States: An Ecological Analysis as of May 2020. *J Rural Health*, 36(3), 433-445.  
811 <https://doi.org/10.1111/jrh.12476>  
812 Zhu, Y., Xie, J., Huang, F., & Cao, L. (2020). Association between short-term exposure to air pollution  
813 and COVID-19 infection: Evidence from China. *Sci Total Environ*, 727, 138704.  
814 <https://doi.org/10.1016/j.scitotenv.2020.138704>  
815
